# Supplementary material for: Shank3 forms a complex with Gal-3 and ZBP-1 to alleviate PANoptosis in TIA of female ovariectomized mice
Source: Research Square preprint supplement (doi:10.21203/rs.3.rs-5824207/v1), 2025-02-03
Supplement: Supplementary file 1 [file 92eb6fe2ce9c67b9b87a9806.docx]

**Shank3 forms a complex with Gal-3 and ZBP-1 to alleviate PANoptosis in TIA of female ovariectomized mice**

Yaowen Luo1†, Jimeng Zhang1†, Junkai Cheng1†, Zheming Yue1†, Min Zhang1†, Xiaobing Li2, Jing Bai2, Juan Li1, Maorong Gou1, YunChao Yuan1, Lian Zhu1, Li Wang1, Yuefei Zhou1*, Xia Li1*, Dakuan Gao1*, Lei Zhang1*

1Department of Neurosurgery, Xijing Hospital, Fourth Military Medical University, Xi’an, China

2Department of Neurology, Xijing Hospital, Fourth Military Medical University, Xi’an, China

†These authors have contributed equally to this work

*Drs. Lei Zhang, Dakuan Gao, Xia Li and Yuefei Zhou shared the last authorship

**Results:**

**S Fig 1.**


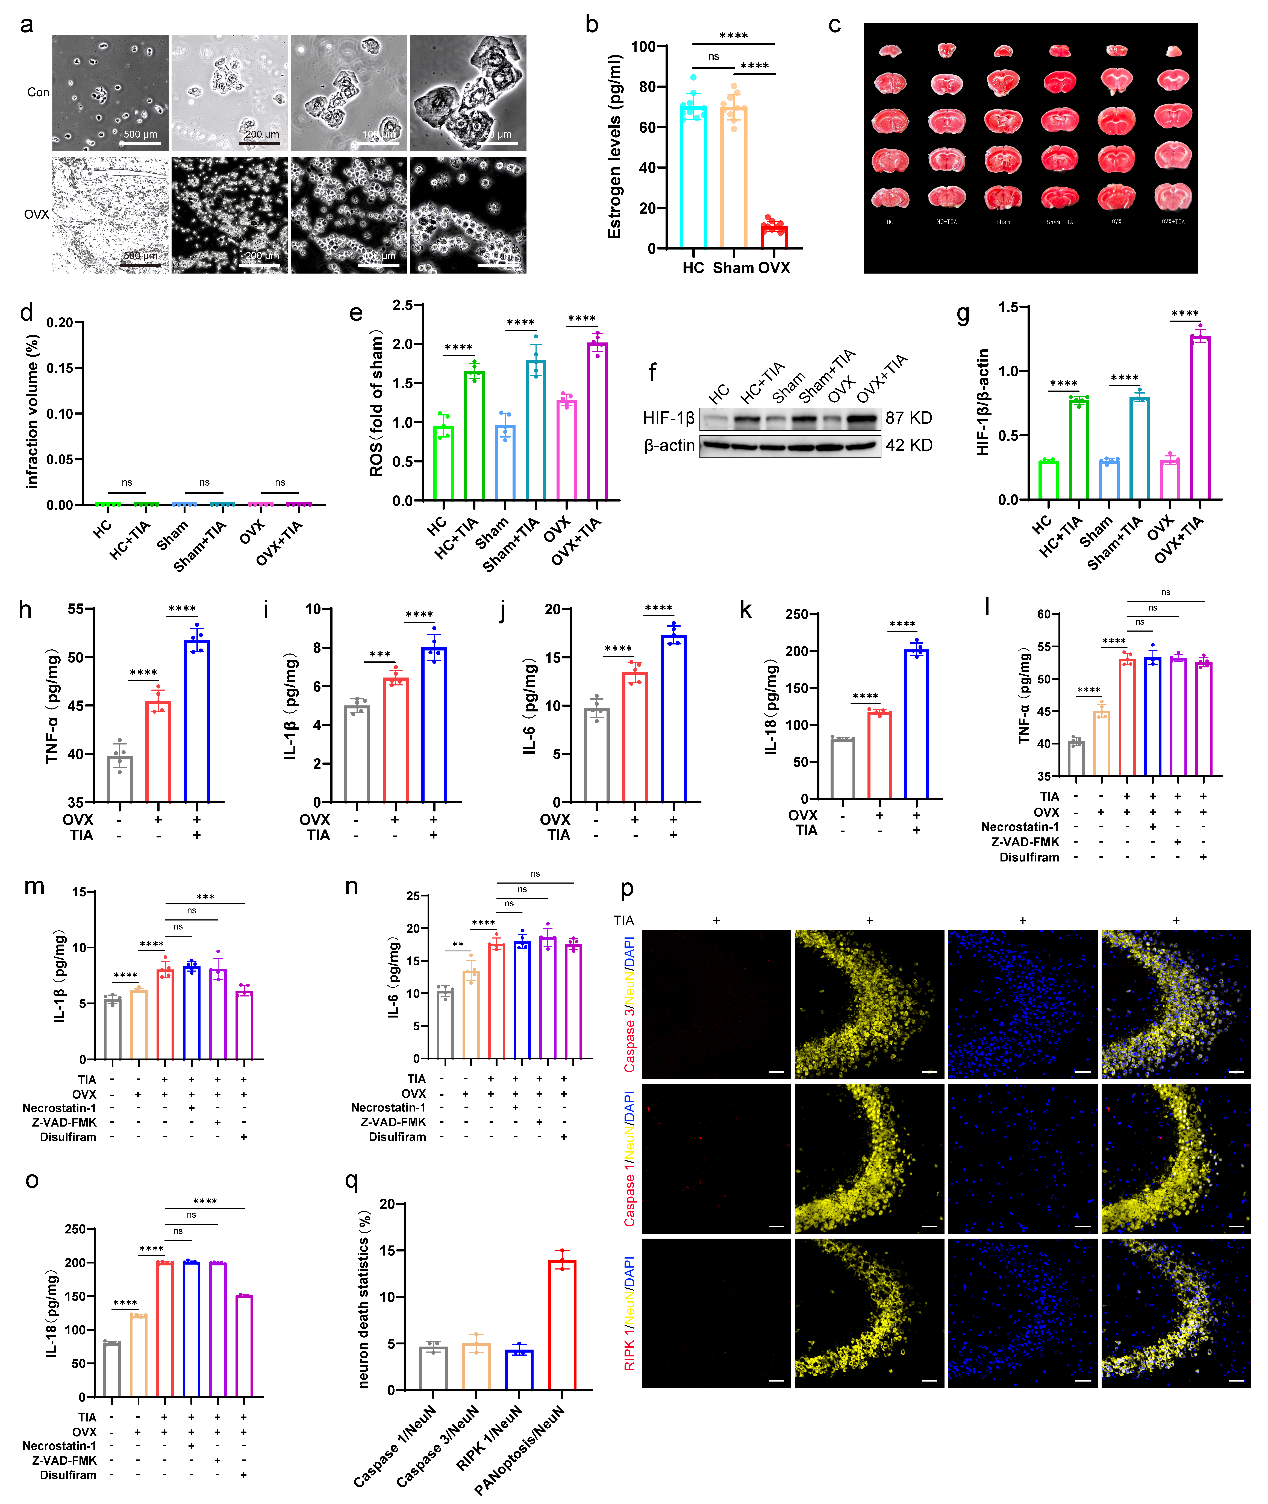


**S Fig 1: Neuronal-special PANoptosis increased in defeminization TIA models of female mice**

a. Pictures of vaginal secretions of mice in Con and OVX groups using different magnifications (Scale bar = 500 μm, 200 μm, 100 μm, 50 μm, n = 3 per group).

b. Determination of estrogen levels in mouse blood using ELISA (n = 3 per group).

c, d. The volume of cerebral infarction in mice in each group was observed using TTC staining (n=3 per group).

e. Hippocampal tissue was collected after TIA, homogenized and ROS levels were determined using an assay kit (n = 5 per group).

f, g. Western blotting analysis of HIF-1β expression in each group after molding (n = 3 per group).

h - k. Detection of TNF-α, IL-1β, IL-6, IL-18 levels in mouse hippocampal area using ELISA kits (n = 3 per group).

l - o. TNF-α, IL-1β, IL-6, and IL-18 levels were measured using ELISA kits following inhibitor administration in hippocampus (n = 3 per group).

p, q. Immunofluorescence double-labelled staining to observe cell death and statistically (Scale bar = 50 μm, n = 3 per group).

All data are expressed using mean ± SD deviation. *P* values were analyzed using one-way ANOVA with Tukey's multiple comparison test. *****P* ＜ 0.0001，****P* ＜ 0.001， ***P* ＜ 0.01， ns*P* ＞0.05. The data were from three independent experiments.

**S Fig 2.**

**
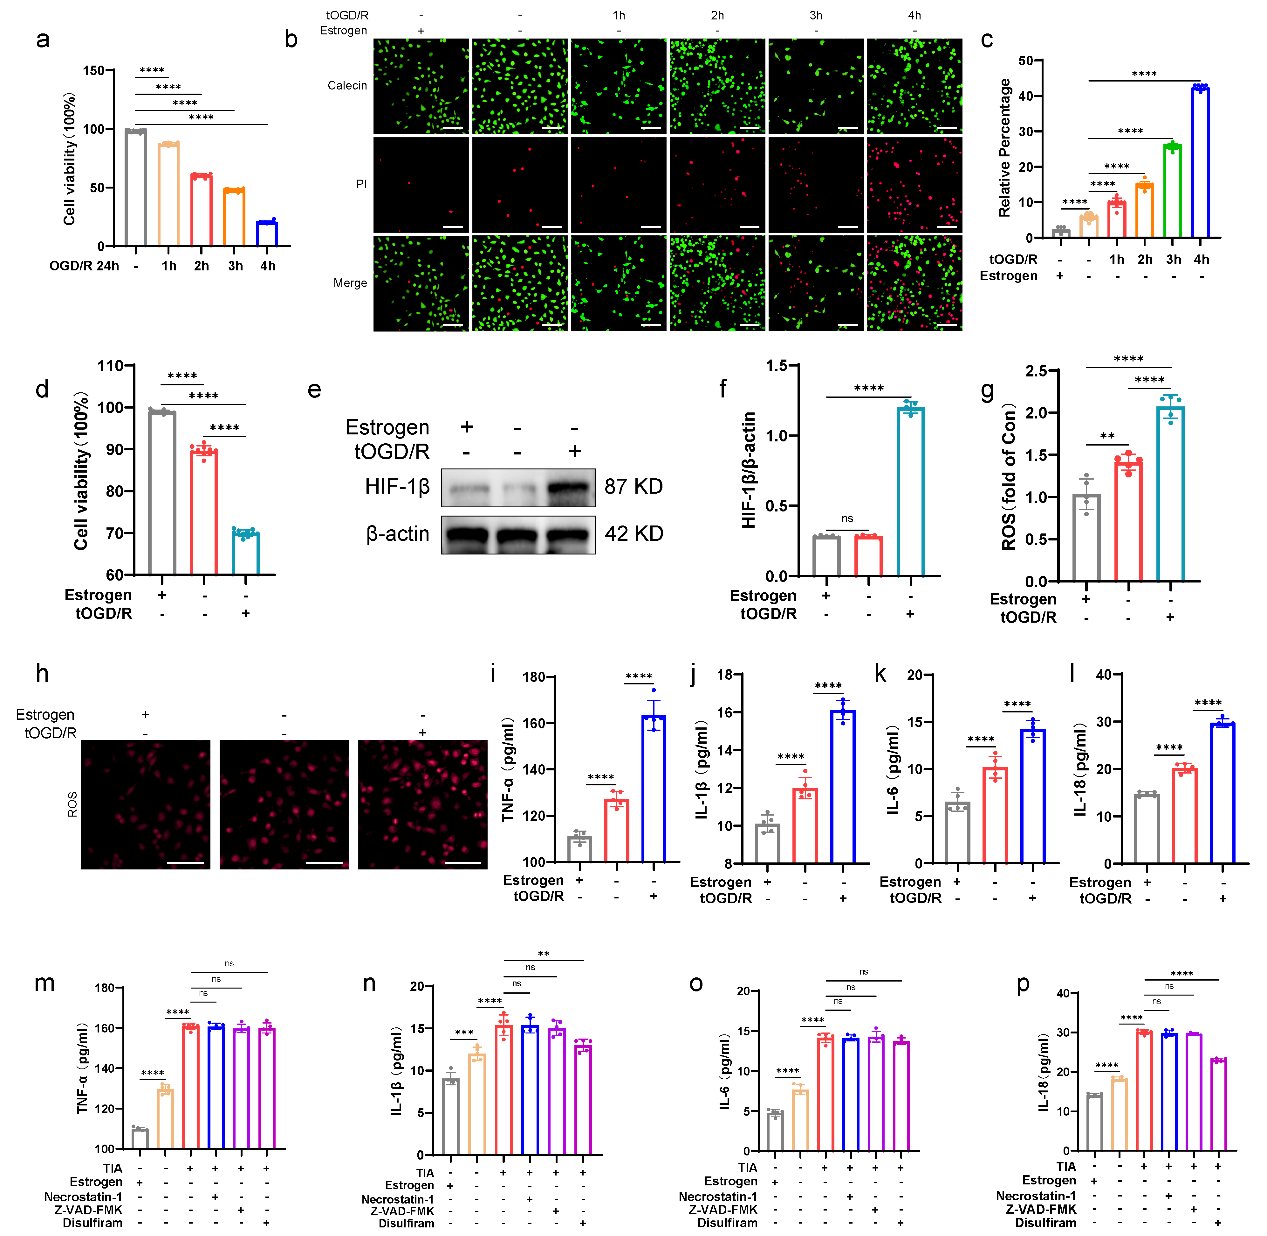
**

**S Fig 2: Establishment of a tOGD/R modal of TIA in neurons which cultured in anti-hormone serum**

a. Cell viability at different times of OGD using CCK8 in the absence of Fulvestrant and PHTPP.

b, c. Representative images show surviving cells (green) and PI+ cells (red) that may undergo apoptosis, necrosis, and pyroptosis in neurons after de-estrogenisation and different times of tOGD/R injury (Scale bar = 100 μm).

d. Detection of cell viability in three groups using CCK8 assay.

e, f. Western blotting analysis of HIF-1β expression in each group after de-estrogenisation and tOGD/R injury.

g, h. Representative fluorescent staining images (Scale bar = 100 μm) and quantitative analysis of ROS levels.

i - l. Detection of TNF-α, IL-1β, IL-6, IL-18 levels in primary neurons using ELISA kits (n = 3 per group).

m - p. TNF-α, IL-1β, IL-6, and IL-18 levels were measured using ELISA kits following inhibitor administration in primary neuron.

All data are expressed using mean ± standard (M ± SD) deviation. *P* values were analyzed using one-way ANOVA with Tukey's multiple comparison test. *****P* ＜ 0.0001，****P* ＜ 0.001， ***P* ＜ 0.01， ns*P* ＞0.05. The data were from three independent experiments.

**S Fig 3.**

**
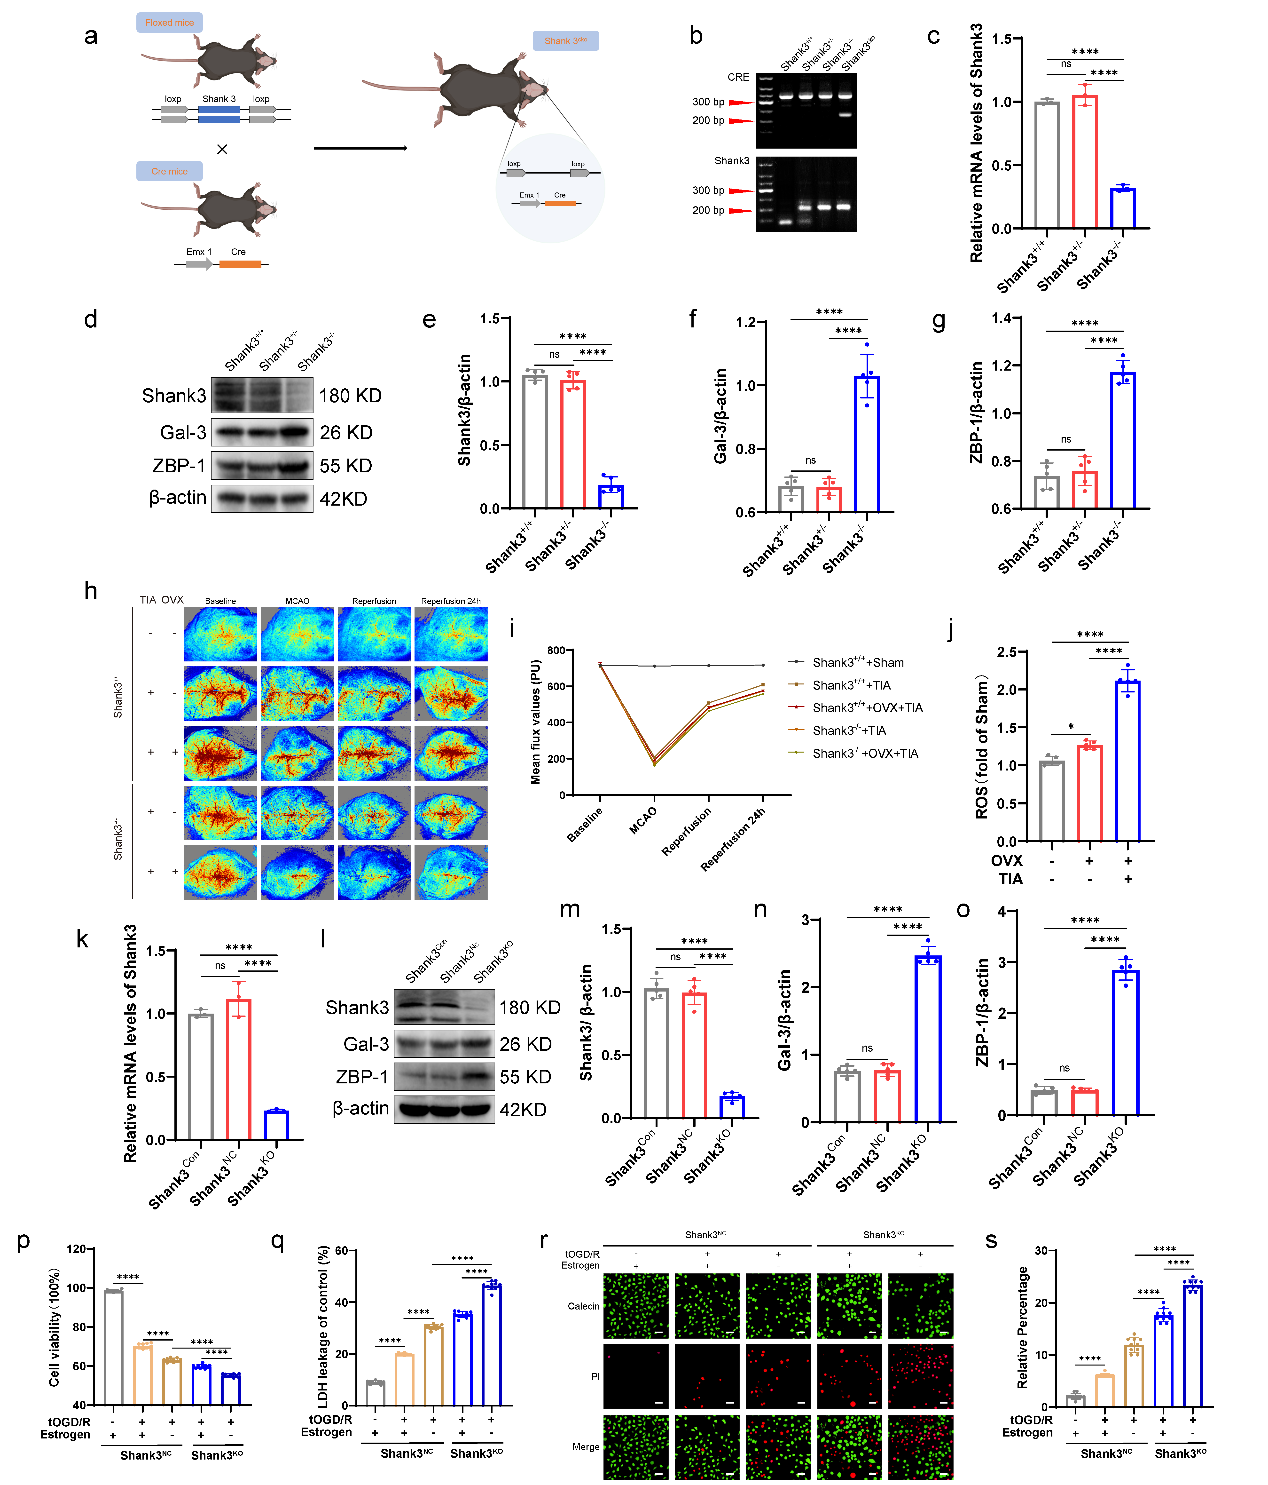
**

**S Fig 3: Shank3 is lowly expressed in defeminization TIA models and maybe an estrogen sensitivity factor that exacerbates neuronal injury and neurological dysfunction**

a. Diagram of the constructed pattern of Shank3 knockout mice.

b. Genotyping of Shank3 knockout mice (n = 3 per group).

c. Detection of Shank3 mRNA expression in hippocampal tissues of Shank3-/-, Shank3+/+, Shank3+/-mice using qPCR (n = 3 per group).

d - g. Western blotting analysis of Shank3, Gal-3, and ZBP-1 protein expression in hippocampus (n = 3 per group).

h. Representative laser scatter images showing CBF at preoperative (Baseline), occlusion (MCAO), immediate reperfusion, and 24 hours of reperfusion (n = 5 per group).

i. Line graph showing mean flux values (PU) in the ischemic hemisphere (n = 5 per oup).

j. Hippocampal tissue was collected, homogenized and ROS levels were determined using an assay kit (n = 3 per group).

k. Analysis of Shank3 mRNA expression in primary neurons after lentiviral transfection using RT-qPCR.

l - o. Western blotting analysis of protein expression of Shank3, Gal-3, ZBP-1 in primary neurons after lentiviral transfection.

p. Survival of groups of cells after lentiviral transfection and modelling using the CCK8 assay.

q. Detection of LDH exudation rate in groups of cells after lentiviral transfection and modelling using a kit.

r, s. Representative images show surviving cells (green) and PI+ cells (red) that may undergo apoptosis, necrosis, and pyroptosis in neurons after de-estrogenisation and tOGD/R injury (Scale bar = 50 μm).

All data are expressed using mean ± SD deviation. *P* values (I) were analyzed using two-way ANOVA, and others were analyzed using one-way ANOVA with Tukey's multiple comparison test. *****P* ＜ 0.0001， **P* ＜ 0.05， ns*P* ＞0.05. The data were from three independent experiments.

**S Fig 4.**

**
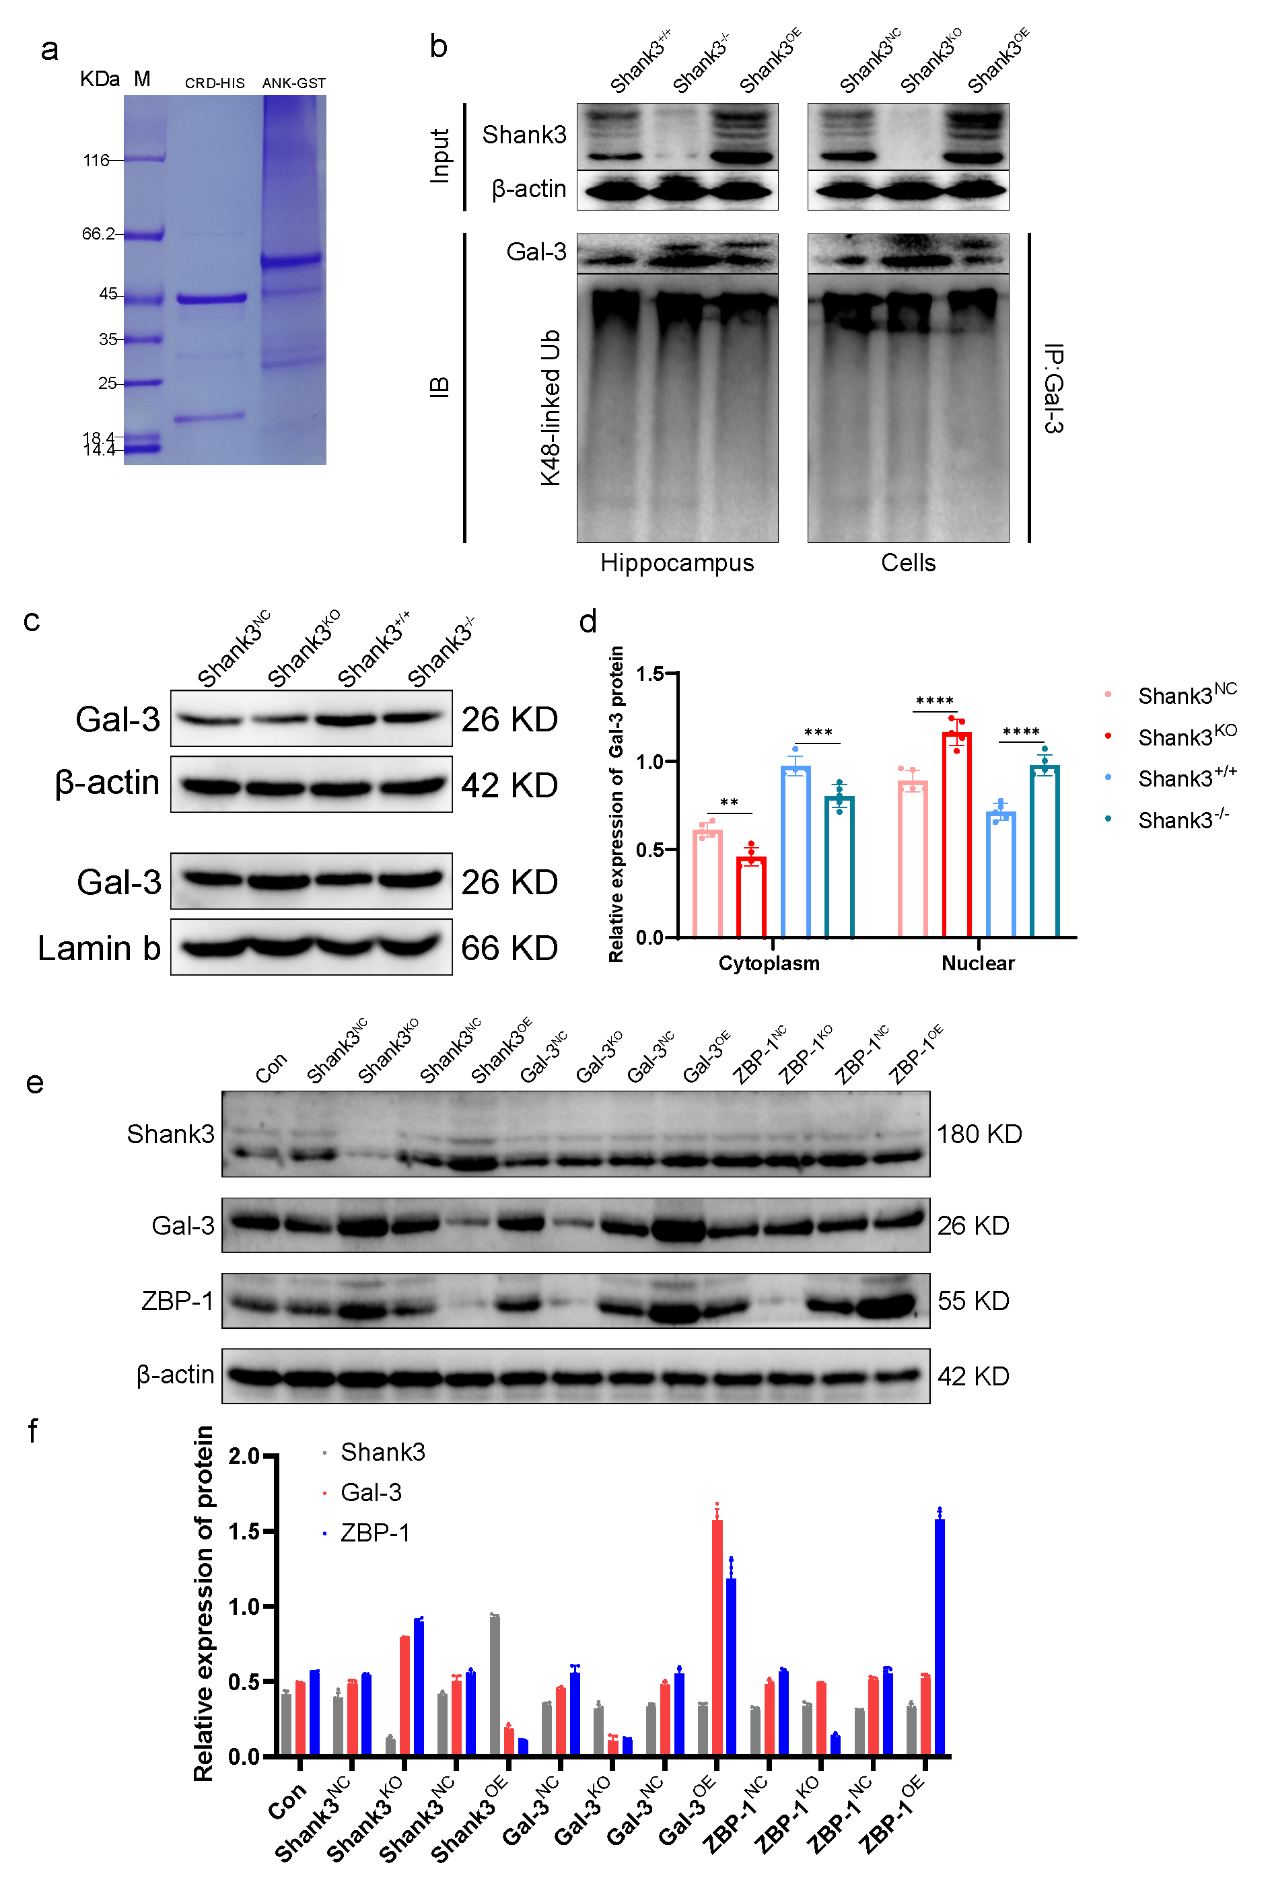
**

**S Fig 4: The plasmid was verified after construction**

a. Validation of purified proteins by Coomassie Blue staining.

b. IP experiments were used to detect the endogenous K48-linked ubiquitination of Gal-3 after Shank3 knockout and overexpress.

c, d. Changes in Gal-3 protein expression in the nucleus and cytoplasm were verified using Shank3+/+, Shank3-/- mice (n = 3 per group) and Shank3NC, Shank3KO cells.

e, f. Western blotting analysis of protein expression of Shank3, Gal-3, ZBP-1 in primary neurons after lentiviral transfection.

All data are expressed using mean ± SD deviation. *P* values were analyzed using one-way ANOVA with Tukey's multiple comparison test. *****P* ＜ 0.0001，****P* ＜ 0.001， ***P* ＜ 0.01. The data were from three independent experiments.

**S Fig 5.**

**
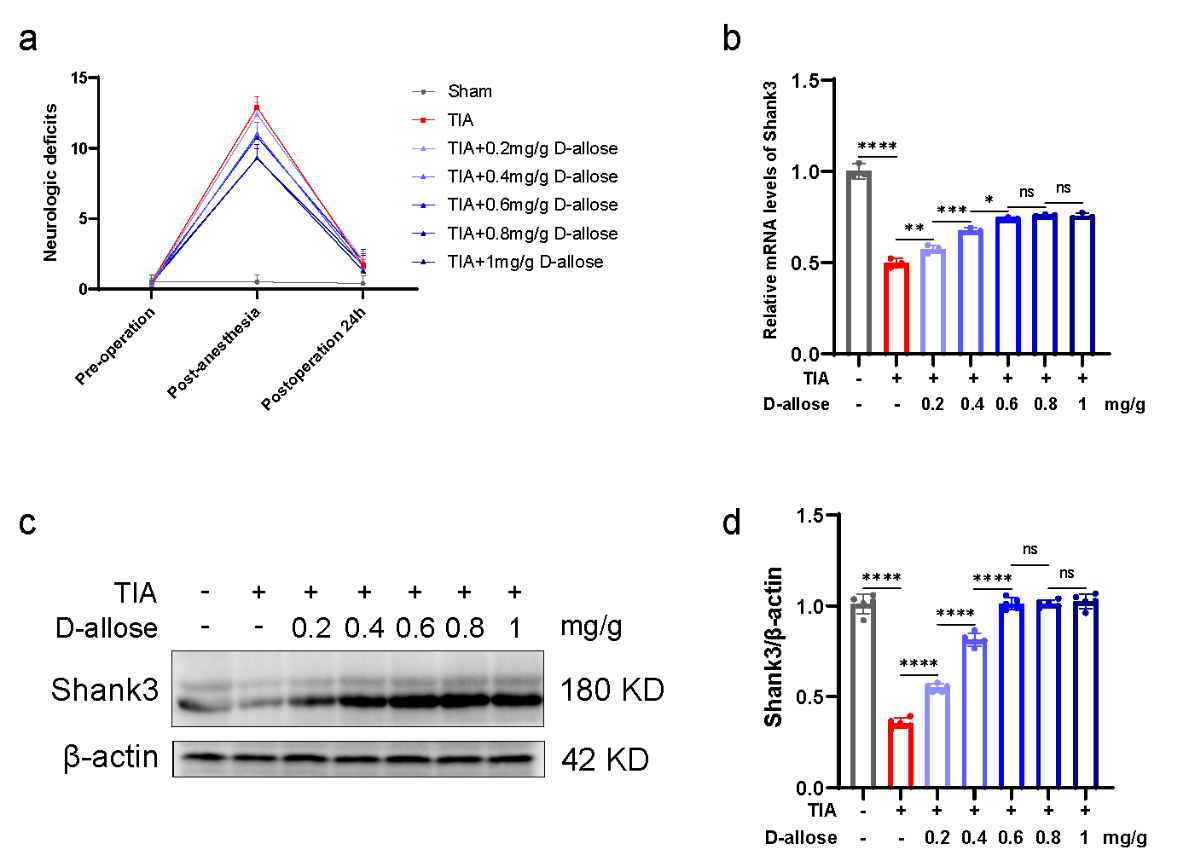
**

**S Fig 5: D-allose enhanced Shank3 attenuates PANoptosis and neurological deficits of OVX female mice after TIA**

a. After TIA modelling, mice were injected with different concentrations of D-allose to assess neurological function (n = 5 per group).

b. Shank3 mRNA expression in hippocampal tissue was detected using RT-qPCR in mice given different concentrations of D-allose after TIA modelling (n = 3 per group).

c, d. Western blotting was used to detect Shank3 protein expression in hippocampal tissues of mice injected with different concentrations of D-allose after TIA modelling (n = 3 per group).

All data are expressed using mean ± SD deviation. *P* values (A) were analyzed using two-way ANOVA, and others were analyzed using one-way ANOVA with Tukey's multiple comparison test. *****P* ＜ 0.0001，****P* ＜ 0.001， ***P* ＜ 0.01， **P* ＜ 0.05， ns*P* ＞0.05. The data were from three independent experiments.

**S Fig 6.**

**
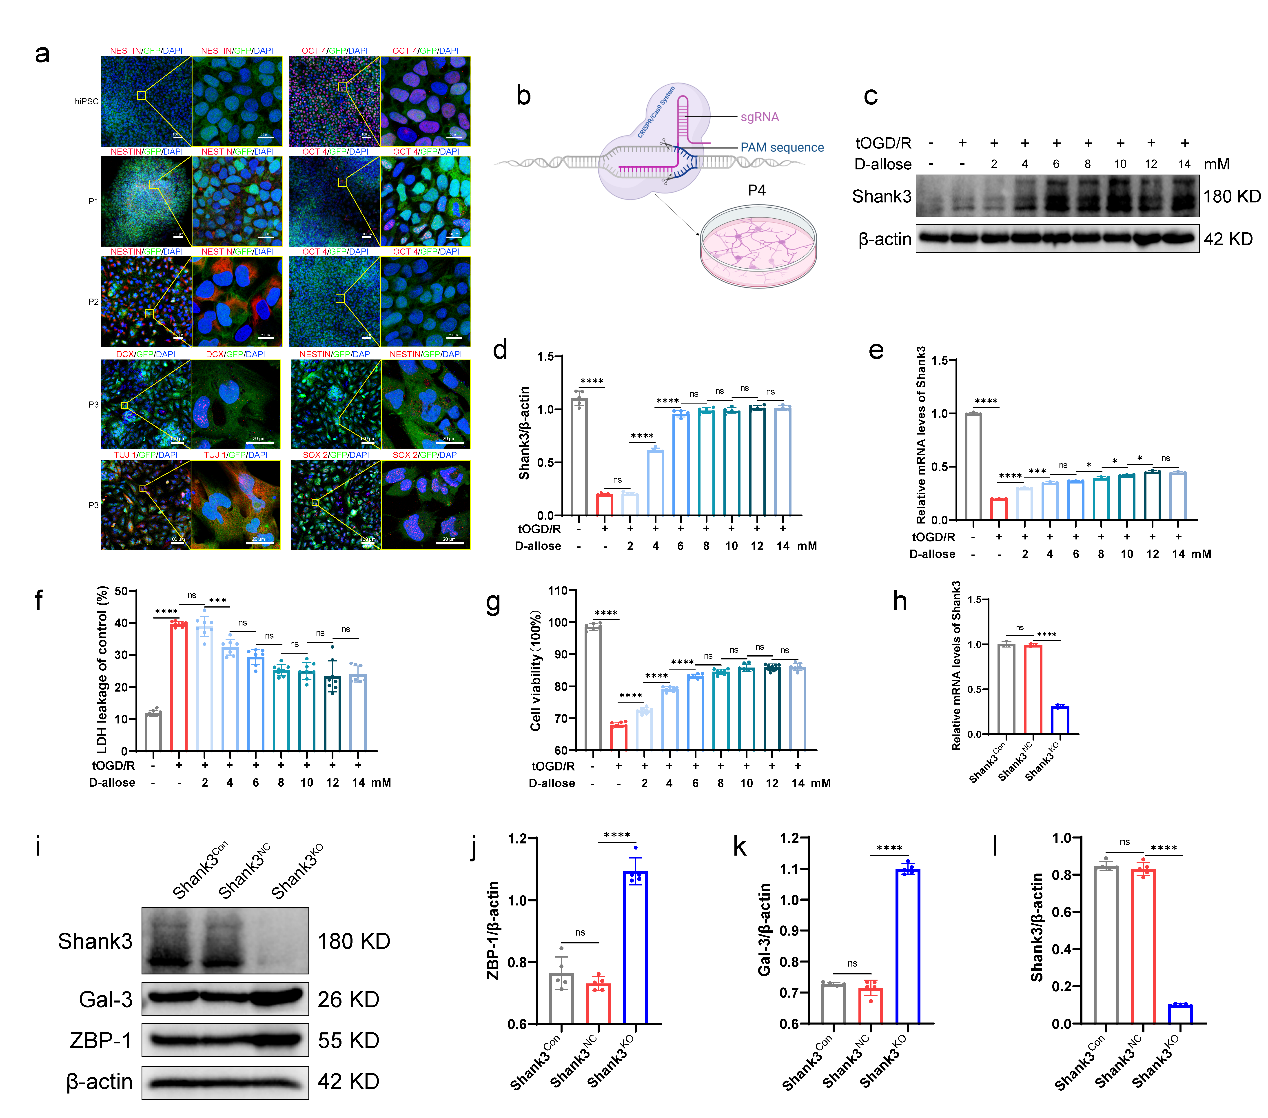
**

**S Fig 6: D-allose alleviates PANoptosis after tOGD/R induced TIA in Shank3 mutant human neurons with de-estrogen**

a. Each stage of differentiation of hiPSCs in culture was determined using immunofluorescence staining to determine the degree of differentiation (Scale bar = 100 μm, 20 μm).

b. Knockdown of human Shank3 in neurons using CRISPR/Cas 9.

c, d. Western blotting was used to detect Shank3 protein expression in hippocampal tissues of mice injected with different concentrations of D-allose after tOGD/R impairment.

e. Use of RT-qPCR in the detection of Shank3 mRNA expression in human neurons after administration of different concentrations of D-allose following tOGD/R injury.

f. The rate of LDH leakage from the cells was examined after administration of different concentrations of D-allose following tOGD/R injury.

g. Cell viability was assayed by CCK8 after administration of different concentrations of D-allose following tOGD/R injury.

h. Shank3 mRNA expression after transfection was detected using RT-qPCR.

i - l. Western blotting analysis of Shank3, Gal-3, and ZBP-1 protein expression in neurons.

TNF-α, IL-1β, IL-6, and IL-18 levels were measured using ELISA kits in human neurons.

All data are expressed using mean ± SD deviation. *P* values were analyzed using one-way ANOVA with Tukey's multiple comparison test. *****P* ＜ 0.0001，****P* ＜ 0.001， **P* ＜ 0.05， ns*P* ＞0.05. The data were from three independent experiments.
